# Supplementary material for: A mathematical model to predict mean time to delivery following cervical ripening with dinoprostone vaginal insert
Source: PubMed Central journal article supplement (PMC6616328; doi:10.1038/s41598-019-46101-2), 2019-07-09
Supplement: 41598_2019_46101_MOESM1_ESM.pdf [file 41598_2019_46101_MOESM1_ESM.pdf]

# A mathematical model to predict mean time to delivery following cervical ripening with dinoprostone vaginal insert.

**Fanny Levast<sup>1, \*</sup>, Guillaume Legendre<sup>1</sup>, Hady El Hachem<sup>2</sup>, Patrick Saulnier<sup>3</sup>, Philippe Descamps<sup>1</sup>, Philippe Gillard<sup>1</sup>, Pierre-Emmanuel Bouet<sup>1</sup>**

<sup>1</sup> Department of Obstetrics and Gynecology, Angers University Hospital, Angers, France

<sup>2</sup> Department of Reproductive Medicine, Clemenceau Medical Center, Beirut, Lebanon

<sup>3</sup> Department of Methodology and Biostatistics, Angers University Hospital, Angers, France

\*Correspondence and requests for materials should be addressed to F.L (email: [fannylevast@yahoo.fr](mailto:fannylevast@yahoo.fr))

**Table of statistics of residuals (a)**

|                         | Minimum     | Maximum    | Mean      | Standard deviation | N   |
|-------------------------|-------------|------------|-----------|--------------------|-----|
| Predictors              | 710,5430    | 1893,6970  | 1236,7085 | 216,57145          | 398 |
| Residuals               | -1295,73462 | 2382,65210 | ,00000    | 616,30556          | 398 |
| Standardized predictors | -2,430      | 3,034      | ,000      | 1,000              | 398 |
| Standardized residuals  | -2,092      | 3,846      | ,000      | ,995               | 398 |

"a" Dependent variable: Time to delivery
